# Supplementary material for: Cool-white light emitting hybrid materials of a resin–mesoporous silica composite matrix encapsulating europium polyoxometalates through an ionic liquid linker
Source: Royal Society of Chemistry journal article supplement (doi:10.1039/c3ra42608d), 2013-01-01
Supplement: c3ra42608d.pdf [file c3ra42608d.pdf]

## Supporting Information

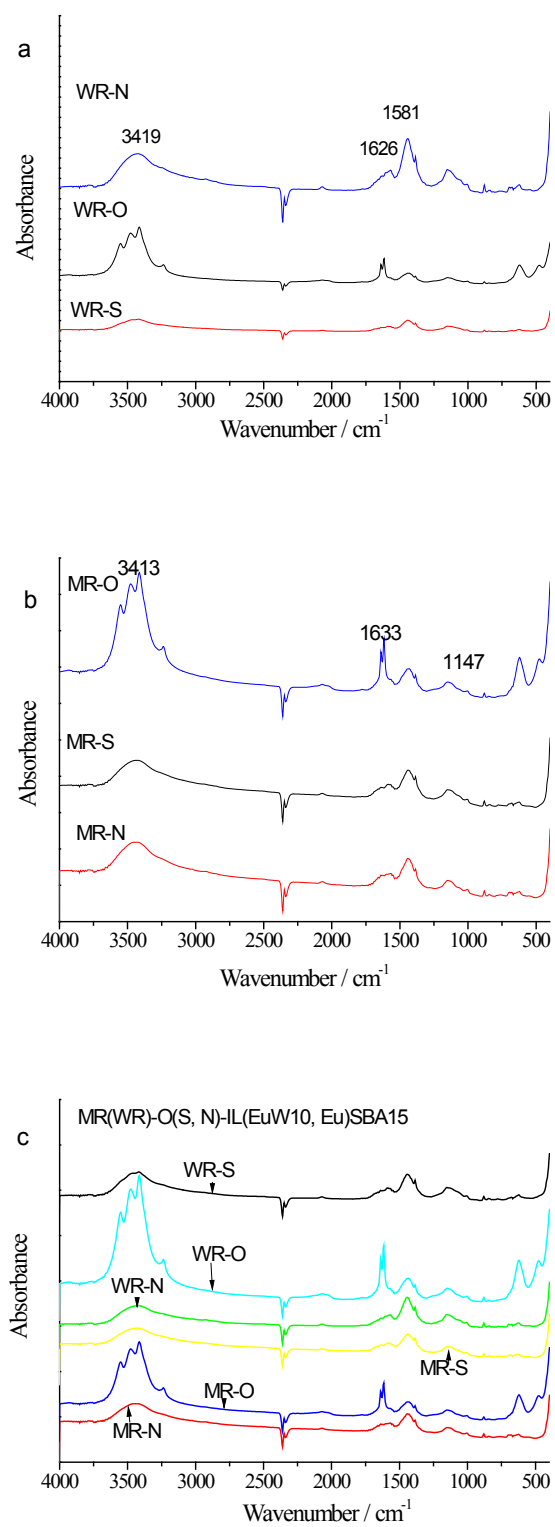

**Figure S1** The selected FTIR spectra of WR-O(S, N) (a), MR-O(S, N) (b) and hybrids MR(WR)-O(S, N)-Eu-S15 (c).

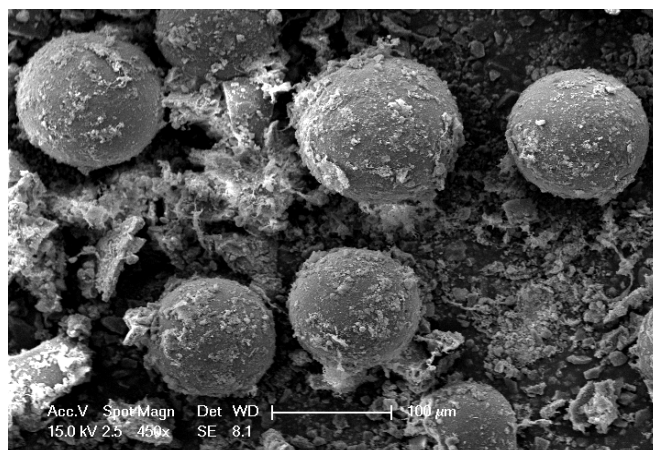

**Figure S2** The selected SEM image of MR-O-Gd-S15 hybrids.

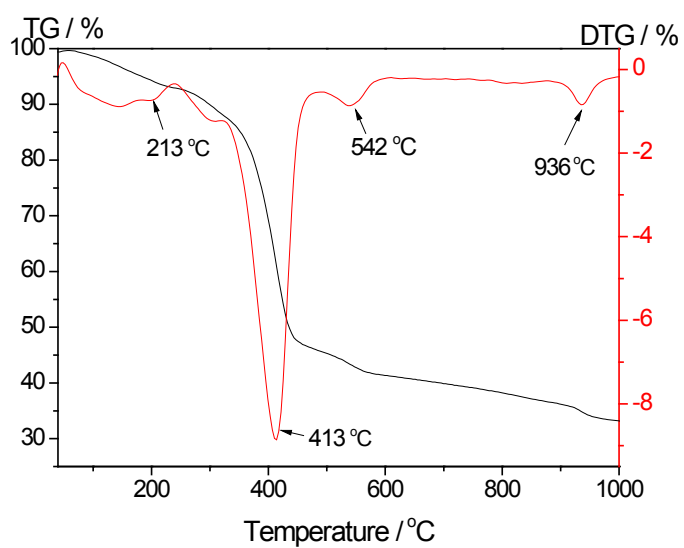

**Figure S3** The selected TG-DTG curves of MR-N-Gd-S15 hybrids.
